# Supplementary material for: Sleepless Nights: Understanding Crop Raiding Behaviour of Wild pig and Nilgai in Central India
Source: Research Square preprint supplement (doi:10.21203/rs.3.rs-8499816/v1), 2026-01-21
Supplement: Supplementary file 1 [file df740f9962e686458459beec.docx]

Table S1. Villages and respective households covered during the questionnaire survey in and around Panna Tiger Reserve, Madhya Pradesh, Central India

| SN | Village Names | Number of Households | Number of Households Practising Agriculture | Number of Households Interviewed |
| --- | --- | --- | --- | --- |
| **1)** | Jijgaon | 200 | 200 | 15 |
| **2)** | Rangunwa | 400 | 350 | 17 |
| **3)** | Baharpura | 300 | 300 | 16 |
| **4)** | Rampura | 50 | 40 | 15 |
| **5)** | Vikrampur | 250 | 250 | 16 |
| **6)** | Ratanpura | 300 | 250 | 14 |
| **7)** | Pahadi bawan | 800 | 600 | 16 |
| **8)** | Toriya | 600 | 500 | 16 |
| **9)** | Hinauta | 700 | 500 | 20 |
| **10)** | Bador | 60 | 50 | 18 |
| **11)** | Patha | 150 | 150 | 15 |
| **12)** | Bimtaha | 100 | 80 | 16 |
| **13)** | Sinhapur | 1250 | 1000 | 12 |
| **14)** | Nahri | 50 | 40 | 15 |
| **15)** | Dhangarh | 80 | 75 | 17 |
| **16)** | Jardhoba | 280 | 280 | 16 |
| **17)** | Jhinna | 300 | 300 | 16 |
| **18)** | Dahlan chauki | 500 | 400 | 18 |
| **19)** | Kudar | 250 | 200 | 17 |
|  |  |  |  | **TOTAL = 305** |
